# Supplementary material
Source: PubMed Central journal article supplement (PMC4678626)
Supplement: NIHMS566215-supplement-1.pdf [file NIHMS566215-supplement-1.pdf]

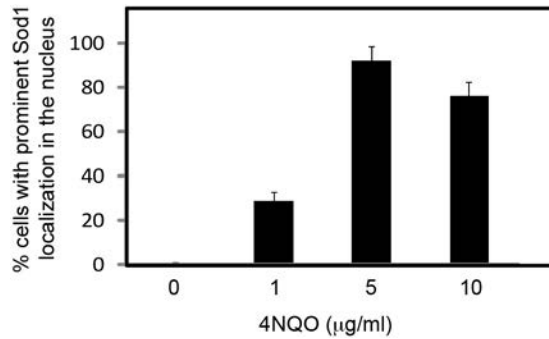

**Supplementary Figure 1. ROS induces rapid Sod1 nuclear localization in a dosage-dependent manner.** WT yeast cells (SZy1051) were treated with 4NQO at different concentrations for 30 min and analyzed for Sod1-Myc9 localization by IF. The nucleus was stained by DAPI. Shown is the quantification of yeast cells with prominent Sod1 nuclear localization. Error bars indicate  $\pm$  SD of triplicates and at least 100 cells were counted per replicate.

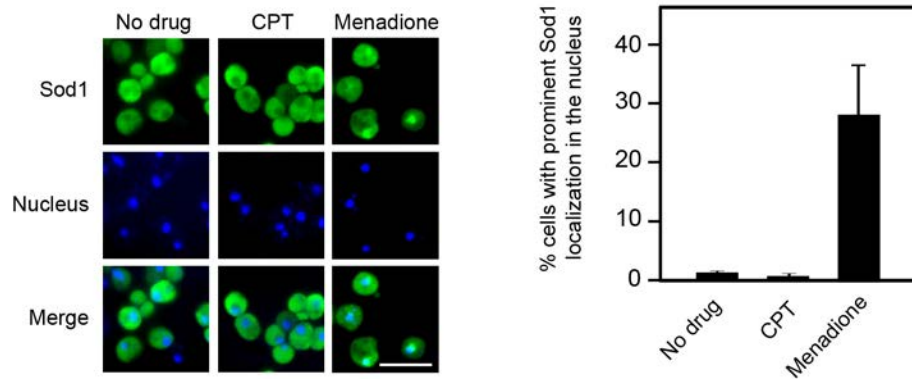

**Supplementary Figure 2. Menadione but not Camptothecin (CPT) causes Sod1 nuclear localization**

WT yeast cells (SZy1051) were treated with oxidative chemical menadione (0.5 mM) or DNA damaging drug camptothecin (CPT, 20  $\mu$ M) for 1 hr. Sod1-Myc9 localization was analyzed by IF. Scale bar, 10 $\mu$ m (left panel). Error bars indicate  $\pm$  SD of triplicates and at least 100 cells were counted per replicate (right panel).

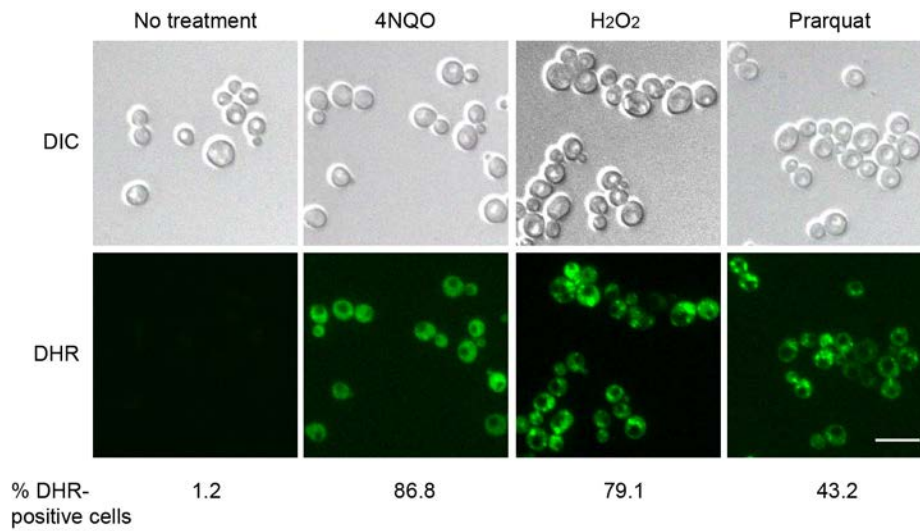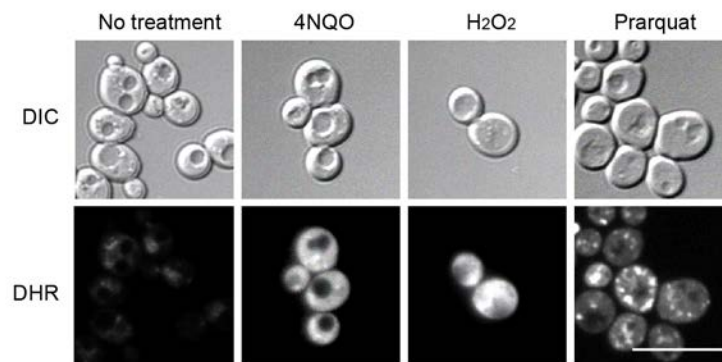

**Supplementary Figure 3.** 4NQO, H<sub>2</sub>O<sub>2</sub> and paraquat treatment causes significant increase in cellular ROS level in yeast. WT yeast cells were treated without or with 5 µg/ml 4NQO, 0.4 mM H<sub>2</sub>O<sub>2</sub>, or 1 mM Paraquat for 20 min, and stained with dihydrorhodamine (DHR) and examined by fluorescence microscopy. Lower panel are enlarged images to show the details of DHR staining. Scale bar, 10µm.

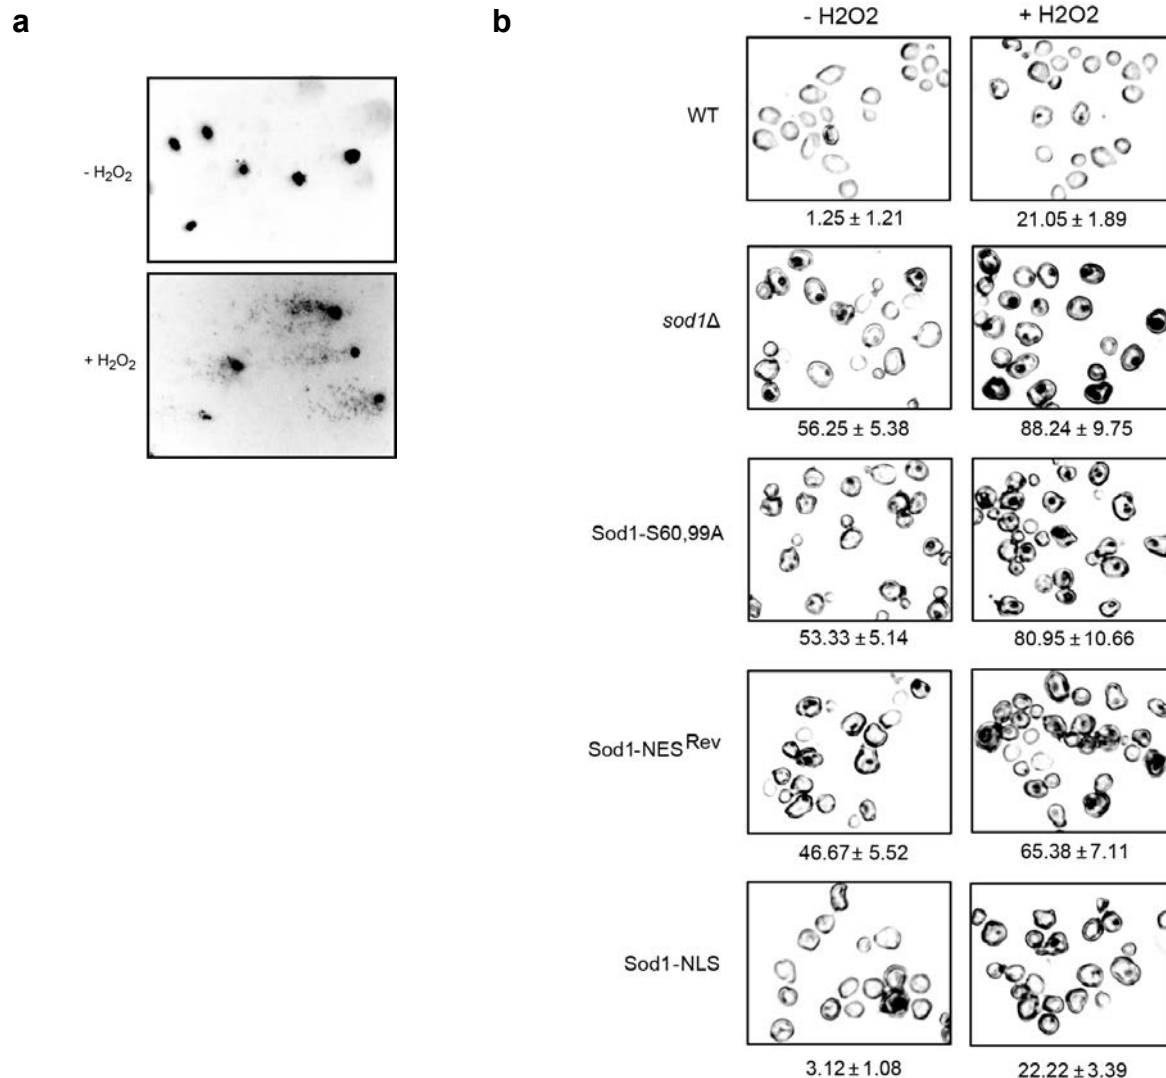

**Supplementary Figure 4. H<sub>2</sub>O<sub>2</sub> treatment leads to genomic DNA damage as determined by Comet and TUNEL assays**

**(a)** H<sub>2</sub>O<sub>2</sub> burst causes genomic DNA damage as determined by Comet assay. WT yeast cells (SZy1051) were treated without or with H<sub>2</sub>O<sub>2</sub> for 20 min and assayed for genomic DNA damage by Comet assay.

**(b)** Nuclear, but not cytoplasmic Sod1 plays a critical role against oxidative DNA damage. WT (SZy1051), *sod1Δ* (SZy1050), Sod1<sup>S60,99A</sup> (SZy2501), Sod1<sup>NLS</sup> (SZy2489) and Sod1<sup>NES</sup> (SZy2499) cells were treated without or with 0.4 mM H<sub>2</sub>O<sub>2</sub> for 20 min and assayed for genomic DNA damage by TUNEL assay. The percentage of TUNEL-positive cells is used to qualitatively describe genomic DNA damage. Data represent mean ± SD from triplicates and at least 100 cells were counted.

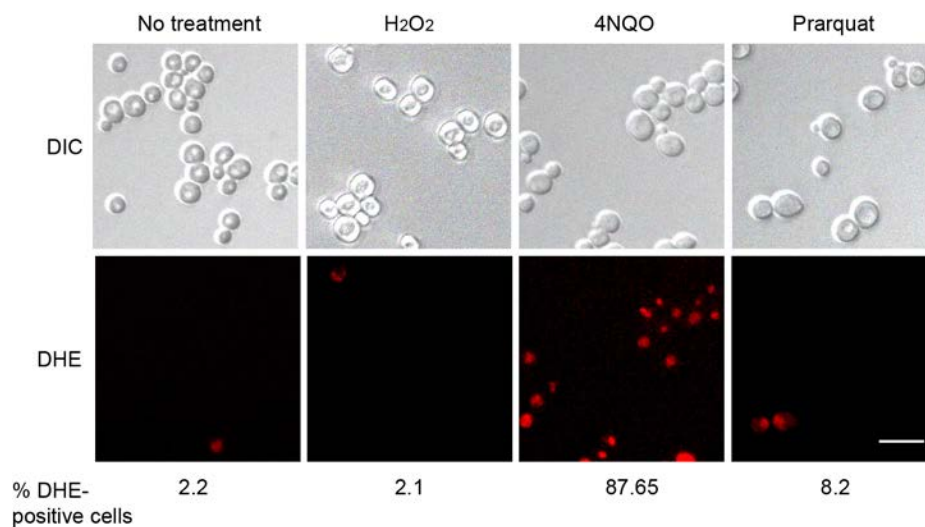

**Supplementary Figure 5. 4NQO and Paraquat, but not H<sub>2</sub>O<sub>2</sub> increase cellular superoxide**

WT yeast cells were treated with 0.4 mM H<sub>2</sub>O<sub>2</sub>, 5 µg/ml 4NQO or 1 mM Paraquat for 20 min. Cellular superoxide was stained with Dihydroethidium (DHE) and analyzed by fluorescence microscopy (n >100). Scale bar, 10µm.

Note: oxidized product of DHE by superoxide subsequently binds to DNA and generates fluorescent signal in the presence of DNA (Free Radic Biol Med.34:1359). Thus the site of fluorescence signal is not the subcellular site where DHE oxidation occurs.

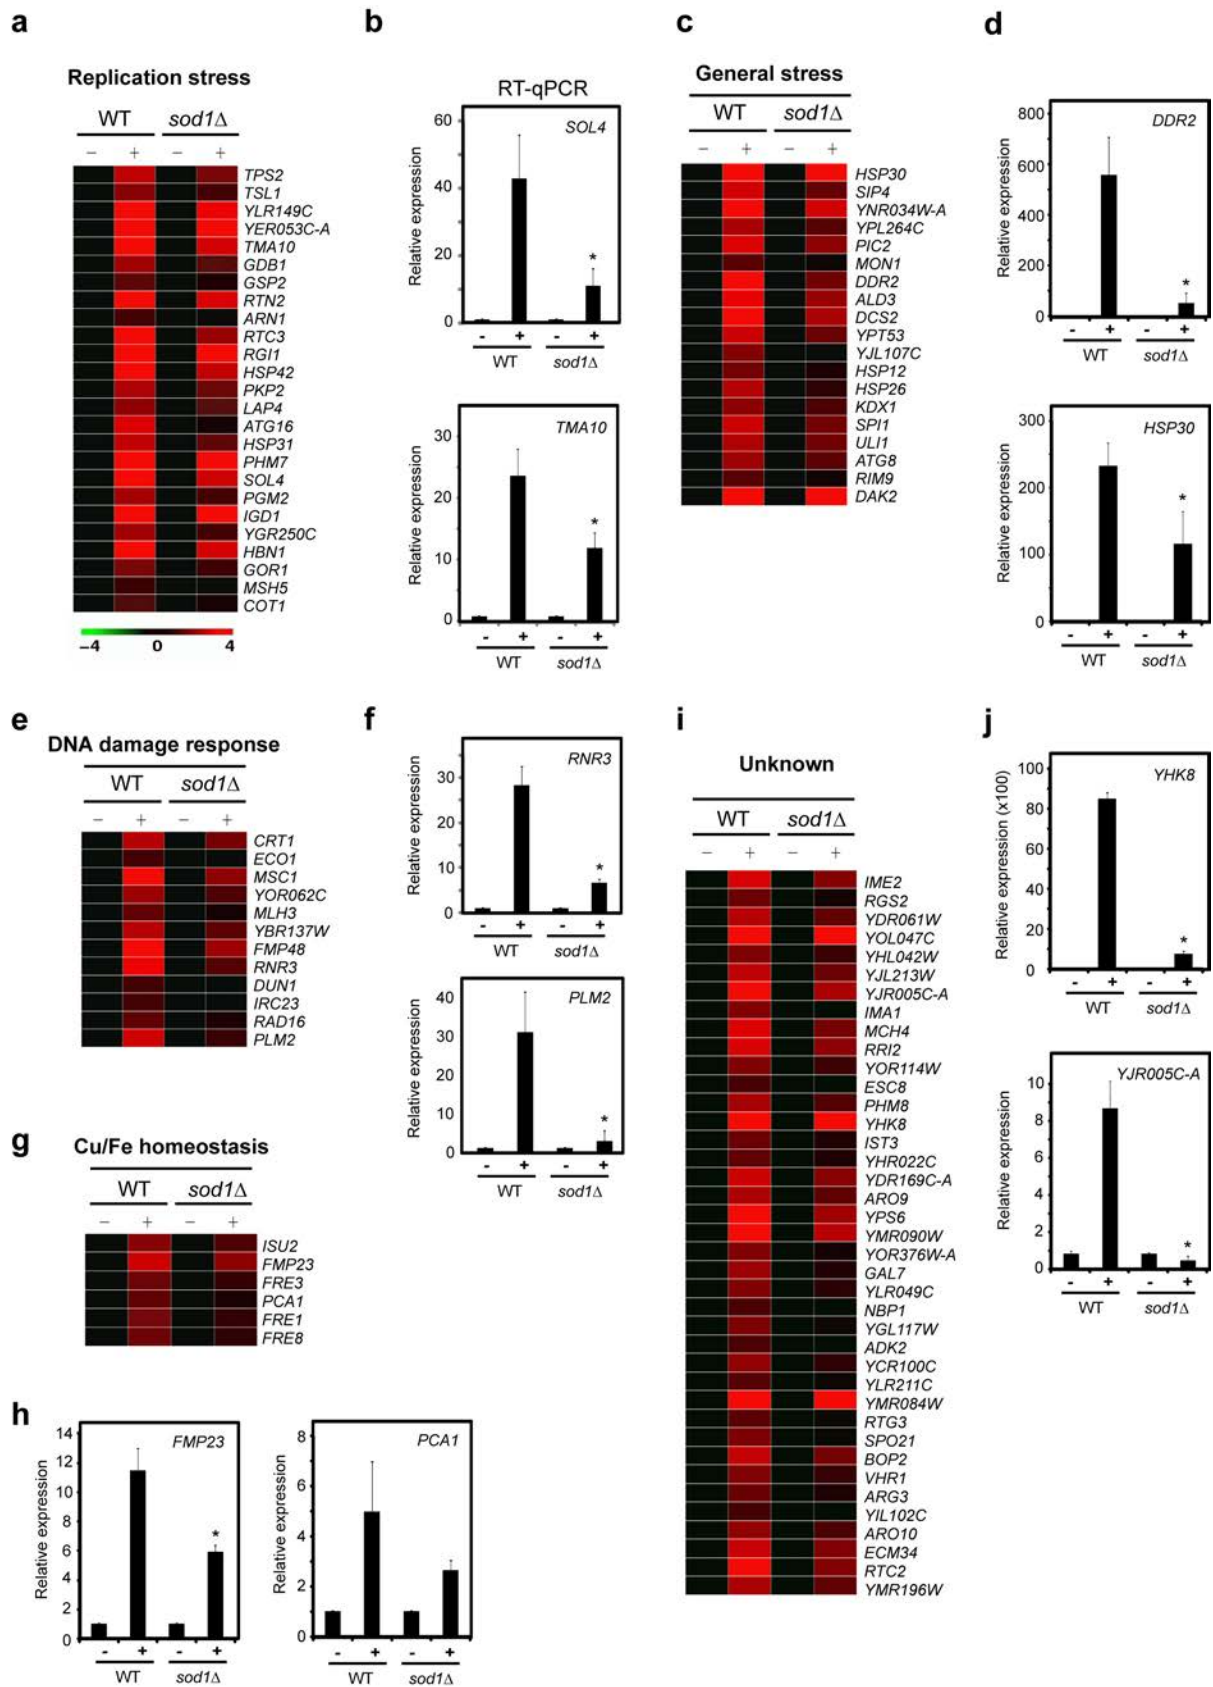

**Supplementary Figure 6.** Sod1 is required for the induction of oxidative response (OR) genes. WT or *sod1Δ* cells were treated without or with H<sub>2</sub>O<sub>2</sub> for 20 min and analyzed for global gene

expression profile by microarray. 123 genes were identified whose induction by H<sub>2</sub>O<sub>2</sub> was reduced by the *sod1Δ* mutation by more than 50%. They were classified into different categories. **(a), (c), (e), (g)** and **(i)** are the heat maps for genes in the category of replication stress, general stress, DNA damage response, Cu/Fe homeostasis and unknown/others. **(b), (d), (f), (h)** and **(j)** RT-qPCR verification of representative genes in different functional categories. *ACT1* expression was used as a reference gene to normalize that of target genes. Error bars indicate ± SD from triplicates of two independent experiments. \*  $p < 0.05$ , Student's *t*-test.

Fig. 1f

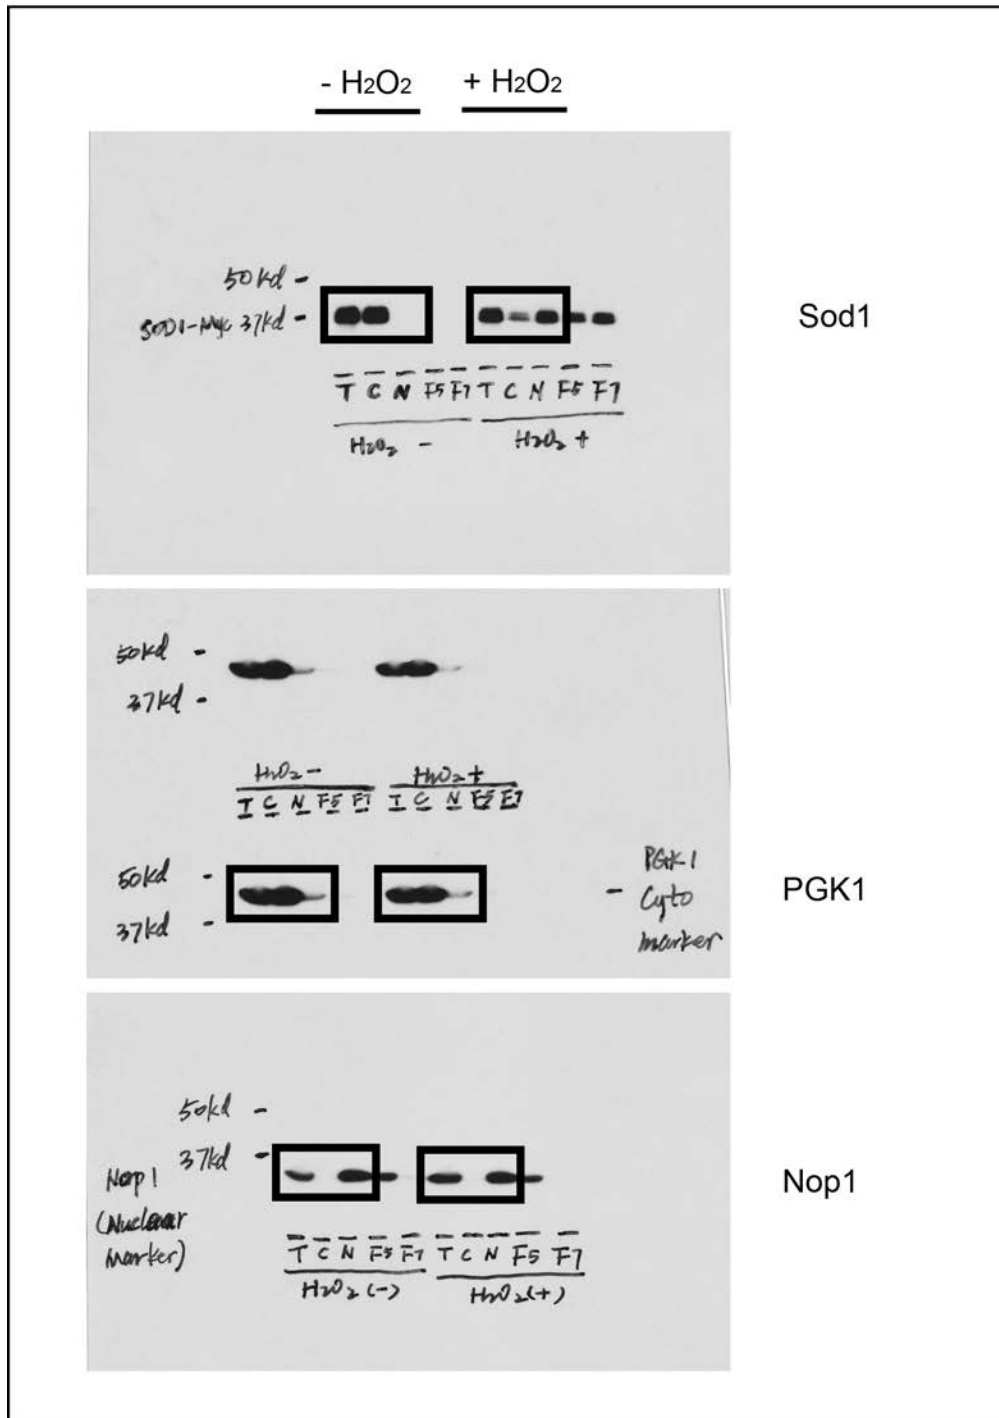

Supplementary Figure 7. Full scans of important original western blots used in this study

Panels corresponding to the figures in the paper are indicated.



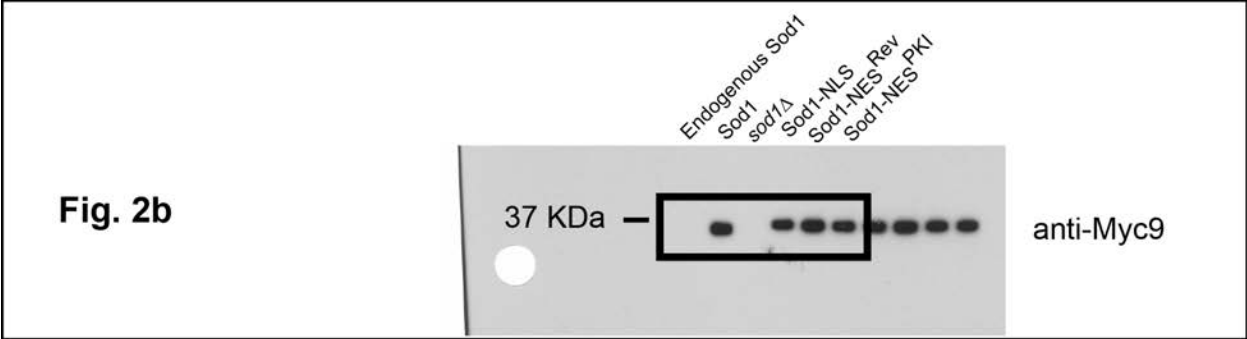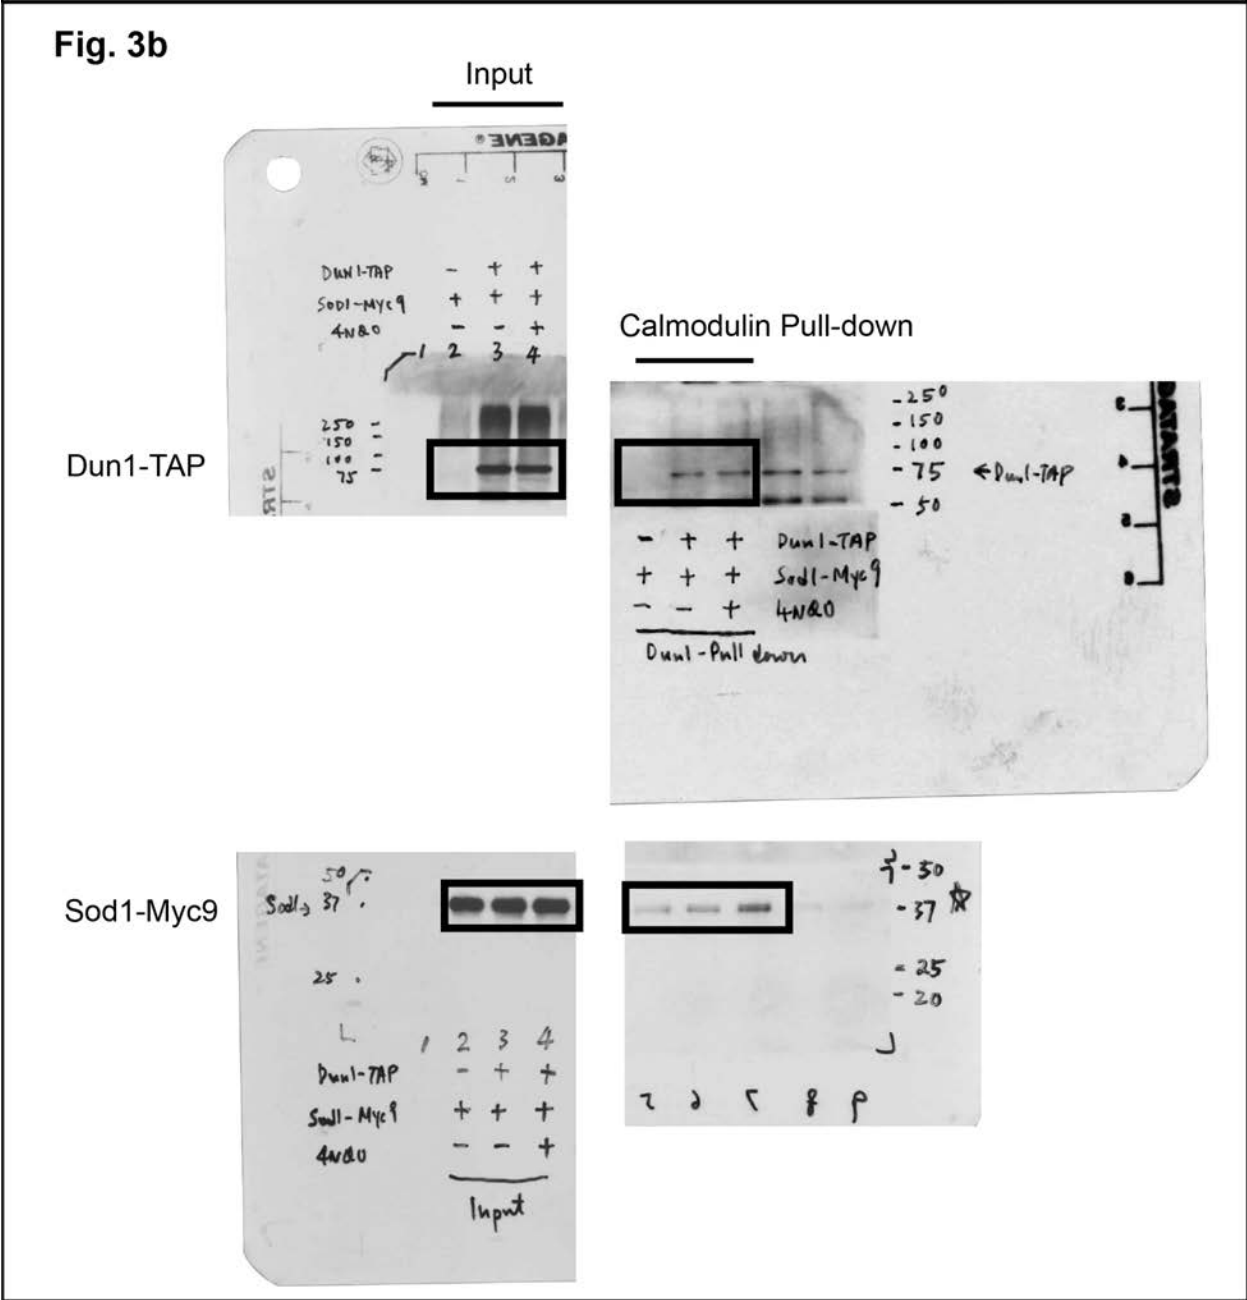

Supplementary Figure 7. Full scans of important original western blots used in this study continued. Panels corresponding to the figures in the paper are indicated.

Fig. 4a

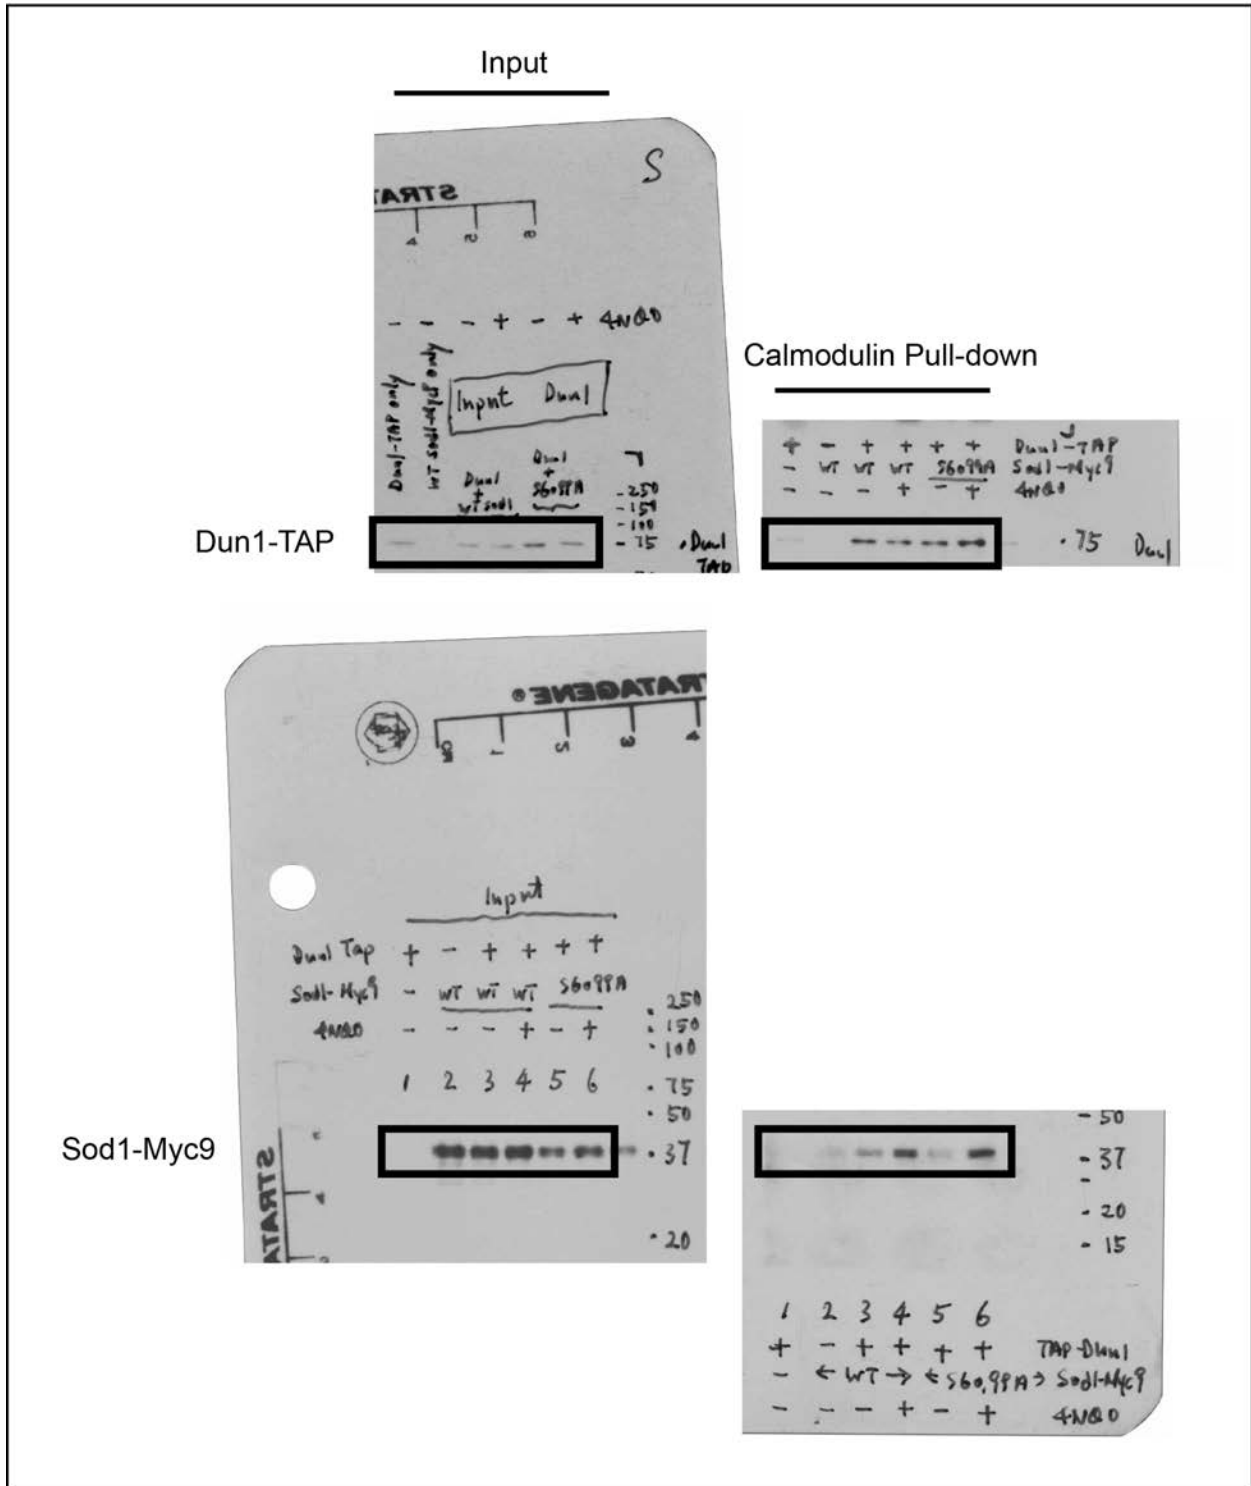

Supplementary Figure 7. Full scans of important original western blots used in this study continued. Panels corresponding to the figures in the paper are indicated.

**Fig 4b**

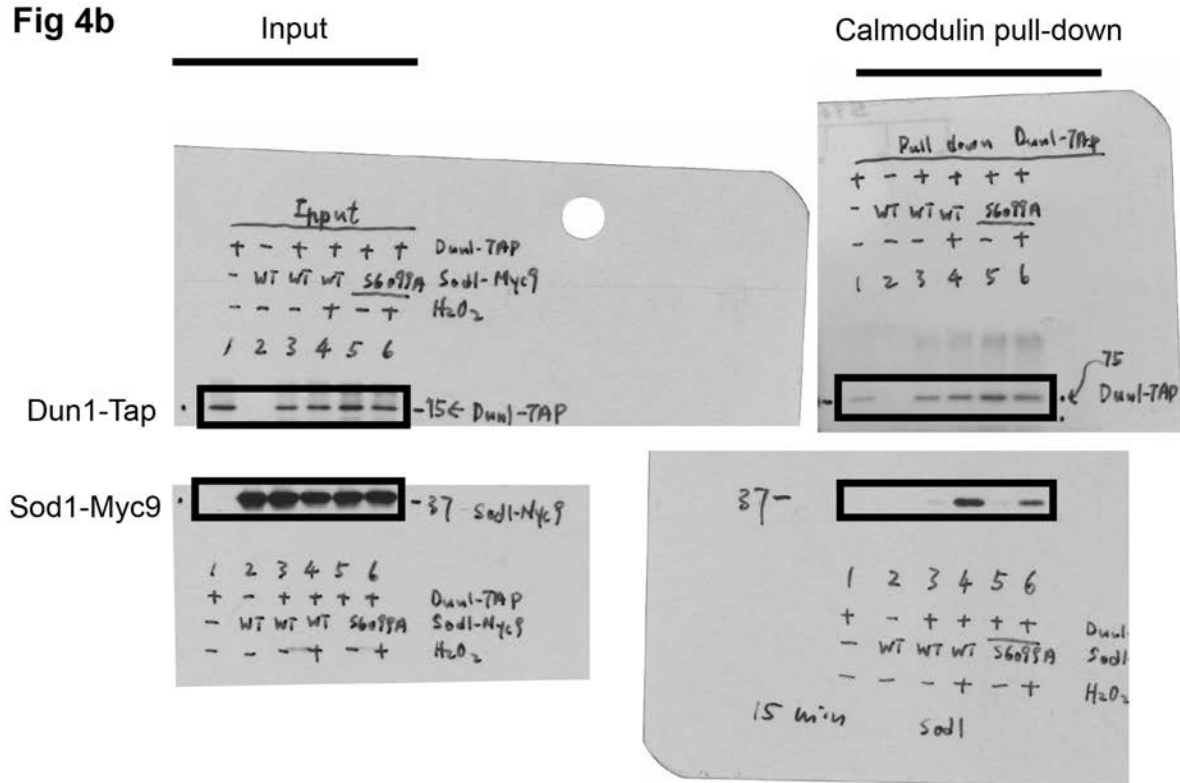

**Fig 4c**

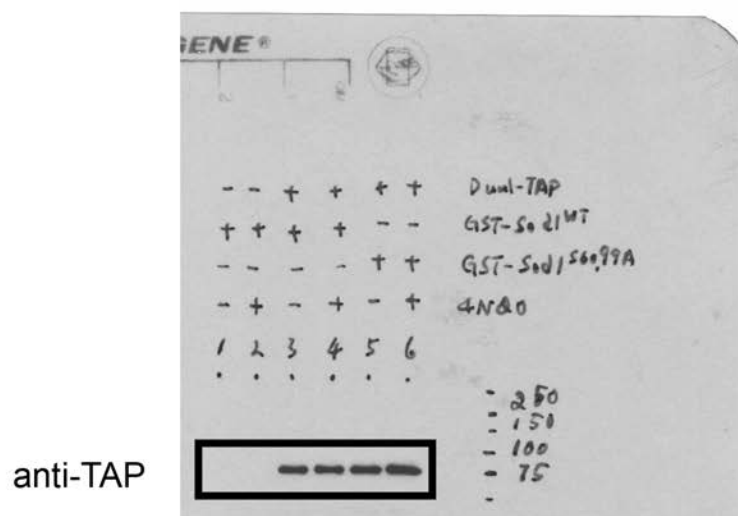

**Supplementary Figure 7. Full scans of important original western blots used in this study continued.** Panels corresponding to the figures in the paper are indicated.

## Supplementary Table 1. Yeast Strains

| Strains  | Genotype                                                                                            |
|----------|-----------------------------------------------------------------------------------------------------|
| SZy1050  | <i>MATa hisΔ1 leu2Δ0 met15Δ0 ura3Δ0 sod1Δ::KanMX pRS415</i>                                         |
| SZy1051  | <i>MATa hisΔ1 leu2Δ0 met15Δ0 ura3Δ0 sod1Δ::KanMX pRS415(SOD1-MYC9)</i>                              |
| SZy 2489 | <i>MATa hisΔ1 leu2Δ0 met15Δ0 ura3Δ0 sod1Δ::KanMX pRS415(SOD1-NLS-MYC9)</i>                          |
| SZy 2490 | <i>MATa hisΔ1 leu2Δ0 met15Δ0 ura3Δ0 sod1Δ::KanMX pRS415(SOD1-NES<sup>REV</sup>-MYC9)</i>            |
| SZy 2491 | <i>MATa hisΔ1 leu2Δ0 met15Δ0 ura3Δ0 sod1Δ::KanMX pRS415(SOD1-NES<sup>PKI</sup>-MYC9)</i>            |
| SZy 2492 | <i>MATa hisΔ1 leu2Δ0 met15Δ0 ura3Δ0 pRS415(SOD1-MYC9)</i>                                           |
| SZy 2493 | <i>MATa hisΔ1 leu2Δ0 met15Δ0 ura3Δ0 dun1Δ::KanMX pRS415(SOD1-MYC9)</i>                              |
| SZy 2494 | <i>MATa leu2 ura3 trp1 his3 mec1-1 pRS415(SOD1-MYC9)</i>                                            |
| SZy 2495 | <i>MATa hisΔ1 leu2Δ0 met15Δ0 ura3Δ0 sod1Δ::KanMX pRS415(SOD1-MYC9) pRS423</i>                       |
| SZy 2496 | <i>MATa hisΔ1 leu2Δ0 met15Δ0 ura3Δ0 sod1Δ::KanMX pRS415 pRS423(DUN1-TAP)</i>                        |
| SZy 2497 | <i>MATa hisΔ1 leu2Δ0 met15Δ0 ura3Δ0 sod1Δ::KanMX pRS415(SOD1-MYC9) pRS423(DUN1-TAP)</i>             |
| SZy 2498 | <i>MATa hisΔ1 leu2Δ0 met15Δ0 ura3Δ0 sod1Δ::KanMX pRS415(SOD1-S60,99A-MYC9)<br/>pRS423(DUN1-TAP)</i> |
| SZy 2499 | <i>MATa hisΔ1 leu2Δ0 met15Δ0 ura3Δ0 sod1Δ::KanMX pRS415(SOD1-S60A-MYC9)</i>                         |
| SZy 2500 | <i>MATa hisΔ1 leu2Δ0 met15Δ0 ura3Δ0 sod1Δ::KanMX pRS415(SOD1-S99A-MYC9)</i>                         |
| SZy 2501 | <i>MATa hisΔ1 leu2Δ0 met15Δ0 ura3Δ0 sod1Δ::KanMX pRS415(SOD1-S60,99A-MYC9)</i>                      |
| SZy 2502 | <i>MATa hisΔ1 leu2Δ0 met15Δ0 ura3Δ0 glr1Δ::KanMX pRS415(SOD1-MYC9)</i>                              |
| SZy 2503 | <i>MATa hisΔ1 leu2Δ0 met15Δ0 ura3Δ0 ctt1Δ::KanMX pRS415(SOD1-MYC9)</i>                              |
| SZy 2504 | <i>MATa hisΔ1 leu2Δ0 met15Δ0 ura3Δ0 yap1Δ::KanMX pRS415(SOD1-MYC9)</i>                              |

**Supplementary Table 2. Primers for Plasmid Construction and Mutagenesis**

| Name   | Construct                            | Sequence                                                                         |
|--------|--------------------------------------|----------------------------------------------------------------------------------|
| SZ2196 | SOD1-NLS<br>(forward)                | TCATTGGTCTAACCAACCCTAAGAAGAAGAGGAAGGTTTCCGGTTCTGCTG<br>CTAG                      |
| SZ2197 | SOD1-NLS<br>(reverse)                | CTAGCAGCAGAACCGGAAACCTTCTCTTCTTCTTAGGGTTGGTTAGACCA<br>ATGA                       |
| SZ2274 | SOD1-NES <sup>PKI</sup><br>(forward) | CATTGGTCTAACCAACTTAGCCTTGAAATTAGCAGGTCTTGATATC<br>AACTCCGGTTCTGCTGCTAG           |
| SZ2275 | SOD1-NES <sup>PKI</sup><br>(reverse) | CTAGCAGCAGAACCGGAGTT GAT ATC AAG ACC TGC TAA TTT CAA GGC<br>TAA GTTGGTTAGACCAATG |
| SZ2276 | SOD1-NES <sup>REV</sup><br>(forward) | CATTGGTCTAACCAACCTT CAG CTA CCA CCG CTT GAG AGA CTT ACT<br>CTTCCGGTTCTGCTGCTAG   |
| Sz2277 | SOD1-NES <sup>REV</sup><br>(reverse) | CTAGCAGCAGAACCGGAAAG AGT AAG TCT CTC AAG CGG TGG TAG CTG<br>AAG GTTGGTTAGACCAATG |
| SZ2317 | GST-SOD1<br>(forward)                | CCGGAATTCATGGTTCAAGCAGTCGCAGT                                                    |
| SZ2318 | GST-SOD1<br>(reverse)                | CCGCTCGAGGTTGGTTAGACCAATGACACCAC                                                 |
| SZ2155 | SOD1 <sup>S60A</sup><br>(forward)    | CACCAATGGTTGTGTCGCTGCTGGTCCTCACTT                                                |
| SZ2156 | SOD1 <sup>S60A</sup><br>(reverse)    | AAGTGAGGACCAGCAGCGACACAACCATTGGTG                                                |
| Sz2161 | SOD1 <sup>S99A</sup><br>(forward)    | GTGTGGCCAAGGGCGCCTTCAAGGACTCT                                                    |
| SZ2162 | SOD1 <sup>S99A</sup><br>(reverse)    | AGAGTCCTTGAAGGCGCCCTTGGCCACAC                                                    |

**Supplementary Table 3. Primers used for RT-qPCR and ChIP assay**

| Name   | Target gene                       | Sequence                      |
|--------|-----------------------------------|-------------------------------|
| SZ2429 | <i>ACT1</i> (forward)             | GTC TGG ATT GGT GGT TCT ATC   |
| SZ2430 | <i>ACT1</i> (reverse)             | GGA CCA CTT TCG TCG TAT TC    |
| SZ2431 | <i>DDR2</i> (forward)             | ATT TCT GCC ATC TCT GTC TTC   |
| SZ2432 | <i>DDR2</i> (reverse)             | ACT CCG GCG TTT AGT AGT       |
| SZ2433 | <i>FMP23</i> (forward)            | ATC CAT CGG AGA CAG GAT AG    |
| SZ2434 | <i>FMP23</i> (reverse)            | GAA GGA GTG TCC TCC ATT TAG   |
| SZ2435 | <i>GRE2</i> (forward)             | CCG GAA CTA TTT GGT GGA TAC   |
| SZ2436 | <i>GRE2</i> (reverse)             | CCT CCG ATA CGA TTA GTC TTT G |
| SZ2437 | <i>HMX1</i> (forward)             | CCG CTA CTA CAG CAG TTT ATC   |
| SZ2438 | <i>HMX1</i> (reverse)             | AAG TAC AGA ACG TGA CAG TAA G |
| SZ2439 | <i>HSP30</i> (forward)            | CTA GAG GGT TCA ATG CAC TTA T |
| SZ2440 | <i>HSP30</i> (reverse)            | CTC ACC GTC TGG TTG AAT AC    |
| SZ2441 | <i>PCAI</i> (forward)             | ACC CAT GGA GAC AAA GAA AG    |
| SZ2442 | <i>PCAI</i> (reverse)             | CTC GAA GAG TGT CCA GAA ATA G |
| SZ2443 | <i>PLM2</i> (forward)             | CGG AGG ATG AGT TGT GTT TAT   |
| SZ2444 | <i>PLM2</i> (reverse)             | CTG TTC TGT ACG AGG TGA ATG   |
| SZ2445 | <i>RNR3</i> (forward)             | GAA CAG AGT TAT CGA CCG TAA T |
| SZ2446 | <i>RNR3</i> (reverse)             | CTG GAC ACC AAG AGC AAT AG    |
| SZ2447 | <i>SOL4</i> (forward)             | AGT GTG TGC TTT CTC GTT AG    |
| SZ2448 | <i>SOL4</i> (reverse)             | CAC ACT AGG TAG TTC GCT ATT T |
| SZ2449 | <i>STF2</i> (forward)             | ACT ACG GTG AAT CTC CAA ATC   |
| SZ2450 | <i>STF2</i> (reverse)             | TGA GCC TCT TCT ATC TTT CTT G |
| SZ2451 | <i>TMA10</i> (reverse)            | CCC TTC TGG TCT TGT TGA AG    |
| SZ2452 | <i>TMA10</i> (forward)            | AGA GGA GGC TAT GGG AAA G     |
| SZ2453 | <i>TSA2</i> (forward)             | CCA ACC TTC CCA GAA AAG AC    |
| SZ2454 | <i>TSA2</i> (reverse)             | CGC CAT AGT CTC TGG ATA AG    |
| SZ2455 | <i>YHK8</i> (forward)             | GAT ACT CTC GGC TCC TAC TT    |
| SZ2456 | <i>YHK8</i> (reverse)             | GGA GTC TTG ACG CCA TTA TT    |
| SZ2457 | <i>YJR005C-A</i> (forward)        | CTA GAA GCT CAA GAA GCT CAG   |
| SZ2458 | <i>YJR005C-A</i> (reverse)        | CGG CTA GTA ATT GGT CTC TTT   |
| SZ2459 | <i>YML131W</i> (forward)          | GGT GAG AAT ACC GTG GAT TAC   |
| SZ2460 | <i>YML131W</i> (reverse)          | TAG CAC CAC AGG CTA TCA       |
| SZ2461 | <i>RNR3</i> promoter<br>(forward) | ACG CCA CAT CCT CAA ATG       |
| SZ2462 | <i>RNR3</i> promoter<br>(reverse) | CTG TGG AAC GGA TGT TGT T     |
| SZ2463 | <i>GRE2</i> promoter<br>(forward) | AGT CTA TCT CTG TAG CGT TGA   |
| SZ2464 | <i>GRE2</i> promoter<br>(reverse) | CAA TGT GTT GGG CAA TGA AC    |
| SZ631  | <i>ACT1</i> promoter<br>(forward) | CGTGAT AAG TGA TAG TGA TAT TC |
| SZ302  | <i>ACT1</i> promoter<br>(reverse) | CAT GAT ACC TTG GTG TCT TG    |
